# Supplementary material
Source: MDPI journal article supplement (https://www.mdpi.com/2071-1050/14/8/4376)
Supplement: s1 [file s1]

## Supplementary file

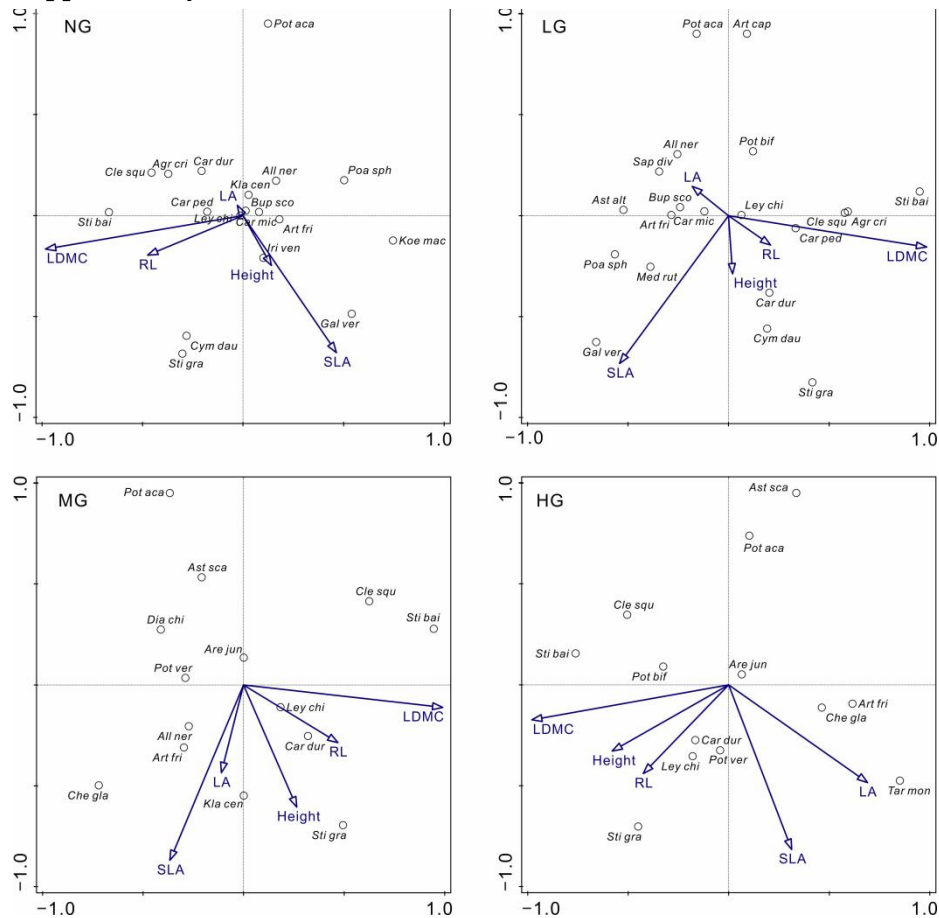

**Figure S1:** The principal coordinates analysis (PCoA) of the first two axes showing the distribution of the species in the functional space of NG, LG, MG and HG. Plant species names are indicated using the first three letters of both the genus and species name. Full names can be found in Table S1.

**Table S1.** Full names of plant species names in Figure S1.

| Species names                    | Abbreviation   |
|----------------------------------|----------------|
| <i>Aster altaicus</i>            | <i>Ast alt</i> |
| <i>Stipa baicalensis</i>         | <i>Sti bai</i> |
| <i>Agropyron cristatum</i>       | <i>Agr cri</i> |
| <i>Carex pediformis</i>          | <i>Car ped</i> |
| <i>Astragalus scaberrimus</i>    | <i>Ast sca</i> |
| <i>Cleistogenes squarrosa</i>    | <i>Cle squ</i> |
| <i>Carex duriuscula</i>          | <i>Car dur</i> |
| <i>Cymbaria daurica</i>          | <i>Cym dau</i> |
| <i>Stipa grandis</i>             | <i>Sti gra</i> |
| <i>Potentilla bifurca</i>        | <i>Pot bif</i> |
| <i>Saposhnikovia divaricata</i>  | <i>Sap div</i> |
| <i>Bupleurum scorzonrifolium</i> | <i>Bup sco</i> |
| <i>Medicago ruthenica</i>        | <i>Med rut</i> |
| <i>Chenopodium glaucum</i>       | <i>Che gla</i> |
| <i>Allium polyrhizum</i>         | <i>All pol</i> |
| <i>Arenaria juncea</i>           | <i>Are jun</i> |

---

|                                 |                |
|---------------------------------|----------------|
| <i>Artemisia frigida</i>        | <i>Art fri</i> |
| <i>Potentilla verticillaris</i> | <i>Pot ver</i> |
| <i>Klasea centauroides</i>      | <i>Kla cen</i> |
| <i>Iris ventricosa</i>          | <i>Iri ven</i> |
| <i>Galium verum</i>             | <i>Gal ver</i> |
| <i>Taraxacum mongolicum</i>     | <i>Tar mon</i> |
| <i>Koeleria macrantha</i>       | <i>Koe mac</i> |
| <i>Dianthus chinensis</i>       | <i>Dia chi</i> |
| <i>Pulsatilla turczaninovii</i> | <i>Pul tur</i> |
| <i>Caragana microphylla</i>     | <i>Car mic</i> |
| <i>Potentilla acaulis</i>       | <i>Pot aca</i> |
| <i>Leymus chinensis</i>         | <i>Ley chi</i> |
| <i>Allium ramosum</i>           | <i>All ram</i> |
| <i>Artemisia capillaris</i>     | <i>Art cap</i> |
| <i>Poa sphondylodes</i>         | <i>Poa sph</i> |
| <i>Thalictrum squarrosum</i>    | <i>Tha squ</i> |
| <i>Allium neriniflorum</i>      | <i>All ner</i> |

---
